# Supplementary material for: Magneto-controlled electrochemical immunosensing platform to assess the senescence-associated GDF-15 marker in colorectal cancer
Source: Royal Society of Chemistry journal article supplement (doi:10.1039/d3sd00311f), 2024-01-01
Supplement: d3sd00311f1.pdf [file d3sd00311f1.pdf]

## SUPPORTING INFORMATION

### **Magneto-controlled electrochemical immunosensing platform to assess the senescence-associated GDF-15 marker in colorectal cancer**

Sandra Tejerina-Miranda<sup>a</sup>, Víctor Pérez-Ginés<sup>a</sup>, Rebeca M. Torrente-Rodríguez<sup>a</sup>, María Pedrero<sup>a</sup>, Ana Montero-Calle<sup>b</sup>, José M. Pingarrón<sup>a</sup>, Rodrigo Barderas<sup>b,\*</sup>, Susana Campuzano<sup>a,\*</sup>

<sup>a</sup>*Departamento de Química Analítica, Facultad de CC. Químicas, Universidad Complutense de Madrid, Pza. de las Ciencias 2, 28040-Madrid, Spain*

<sup>b</sup>*Chronic Disease Programme, UFIEC, Institute of Health Carlos III, Majadahonda, 28220-Madrid. Spain*

\* to whom correspondence should be addressed ([r.barderasm@isciii.es](mailto:r.barderasm@isciii.es); [susanacr@quim.ucm.es](mailto:susanacr@quim.ucm.es))

| CONTENTS   | PAGE |
|------------|------|
| Fig. S1    | S2   |
| Table S1   | S3   |
| References | S4   |

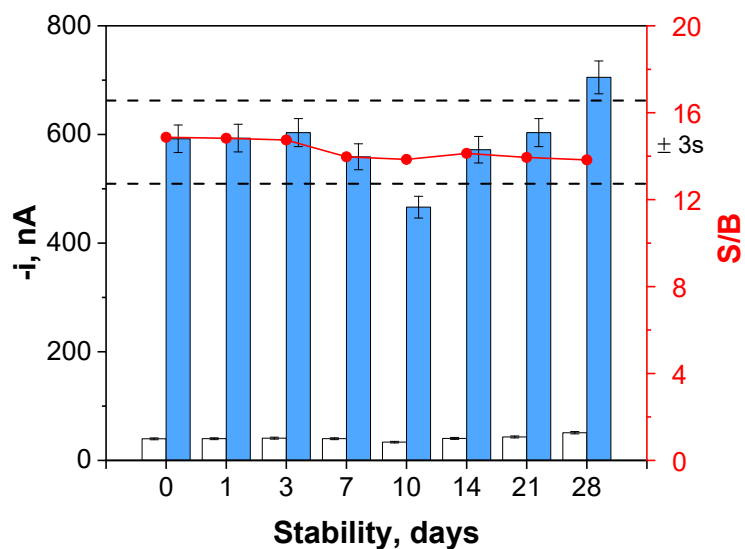

**Fig. S1.** Amperometric responses provided by the immunoplatfroms prepared each control day using the stored CAb-MBs (in filtered PBS at 4 °C) after their preparation (day 0 is the CAb-MBs preparation day) for 0 (white bars) and 2500 pg mL<sup>-1</sup> GDF-15 (blue bars). Control limits (dashed black lines) were set as  $\pm 3s$  of the mean value of the measurements provided by three bioplatfroms prepared on day 0.

**Table S1.** Relevant characteristics of electrochemical immunosensors and immunoassays reported for the determination of GDF-15.

| Electrode | Linear Range                                         | LOD                       | Assay time                                                                                                                                                                 | Application        | Ref       |
|-----------|------------------------------------------------------|---------------------------|----------------------------------------------------------------------------------------------------------------------------------------------------------------------------|--------------------|-----------|
| GCE       | 1.0 pg mL <sup>-1</sup> –<br>50 ng mL <sup>-1</sup>  | 0.825 pg mL <sup>-1</sup> | 1 h (AuPtCu NFs and SWCNTs: 1 h; AuPtCu NFs-SWCNTs@MoS <sub>2</sub> -rGO (A@M): 25 h; A@M/CAb: 12 h; A@M/CAb/BSA: 1 h; A@M/CAb/BSA/GDF-15: 1 h)                            | Human serum (CVDs) | [1]       |
| GCE       | 1.5 pg mL <sup>-1</sup> –<br>1.5 µg mL <sup>-1</sup> | 0.9 pg mL <sup>-1</sup>   | 3 h 30 min (MoS <sub>2</sub> /AuPtPd NDs: 1 h 45 min; MoS <sub>2</sub> /AuPtPd-DAb: 10 h)                                                                                  | Human blood (CVDs) | [2]       |
| GCE       | 100 fg mL <sup>-1</sup> –<br>10 ng mL <sup>-1</sup>  | 42.23 fg mL <sup>-1</sup> | 3 h (PANI/Pd NPs: 16 h 50 min; ZnGa <sub>2</sub> O <sub>4</sub> /Au NPs/Ab <sub>2</sub> : 25 h 7min; CAb- PANI/PdNPs: overnight)                                           | Human serum (CVDs) | [3]       |
| GCE       | 500 fg mL <sup>-1</sup> – 50 ng mL <sup>-1</sup>     | 0.212 pg mL <sup>-1</sup> | 3 h 40 min (Au TNPs: 15 h; GDY-Au TNPs: 6 h 46 min; AuPtCu HNFs: 10 h 35 min; MoS <sub>2</sub> : 24 h 26 min; MoS <sub>2</sub> -AuPtCu HNFs-Ab <sub>2</sub> : 12 h 45 min) | Human serum (CVDs) | [4]       |
| SPCE      | 140–10000 pg mL <sup>-1</sup>                        | 42 pg mL <sup>-1</sup>    | 1 h 15 min (CAb-MBs: 2 h 40 min)                                                                                                                                           | Human plasma       | This work |

*Au TNPs: Au triangular nanoprisms; BSA: bovine serum albumin; CAb: capture antibody; DAb: detector antibody; CVDs: cardiovascular diseases; GCE: glassy carbon electrode; MoS<sub>2</sub>-AuPtCu HNF: AuPtCu hexagonal metal nanoframes loaded onto molybdenum disulfide nanosheets; GDY: graphyne; GDY-Au TNPs: Au triangular nanoprisms hybridized with graphyne; MBs: magnetic beads; MoS<sub>2</sub>/AuPtPd NDs: MoS<sub>2</sub>/AuPtPd nanodendrite; NFs: nanoflowers; PANI/PdNPs: hollow polyaniline microtubules decorated with Pd nanoparticles; rGO: reduced graphene oxide; SPCEs: screen-printed carbon electrodes; SWCNTs: single-walled carbon nanotubes; ZnGa<sub>2</sub>O<sub>4</sub>/Au NPs: peony-like zinc gallinate coupled with Au nanoparticles.*

## References

- [1] Y. Jiao, Z. Huang, M. Chen, X. Zhou, H. Lu, B. Wang and X. Dai, *Anal. Meth.*, 2022, 14, 1420–1429.
- [2] M. Chen, L. Zhao, D. Wu, S. Tu, C. Chen, H. Guo and Y. Xu, *Anal. Chim. Acta*, 2022, 1223, 340194.
- [3] C. Chen, J. Kang, S. Wang, S. Chen, H. Guo and M. Chen, *Mikrochim. Acta*, 2023, 190, 92.
- [4] M. Chen, Y. Jiao, C. Chen, Y. Wang, H. Lu, and X. Dai, *Microchem. J.*, 2023, 193, 109150.
